# Supplementary material for: Analyses of sea surface chlorophyll a trends and variability from 1998 to 2020 in the German Bight (North Sea)
Source: Copernicus journal article supplement (doi:10.5194/os-20-1247-2024), 2024-10-14
Supplement: Supplementary file 1 [file os-20-1247-2024-supplement.pdf]

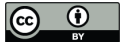

*Supplement of*

## **Analyses of sea surface chlorophyll *a* trends and variability from 1998 to 2020 in the German Bight (North Sea)**

**Felipe de Luca Lopes de Amorim et al.**

*Correspondence to:* Felipe de Luca Lopes de Amorim ([felipelamorim@gmail.com](mailto:felipelamorim@gmail.com))

The copyright of individual parts of the supplement might differ from the article licence.

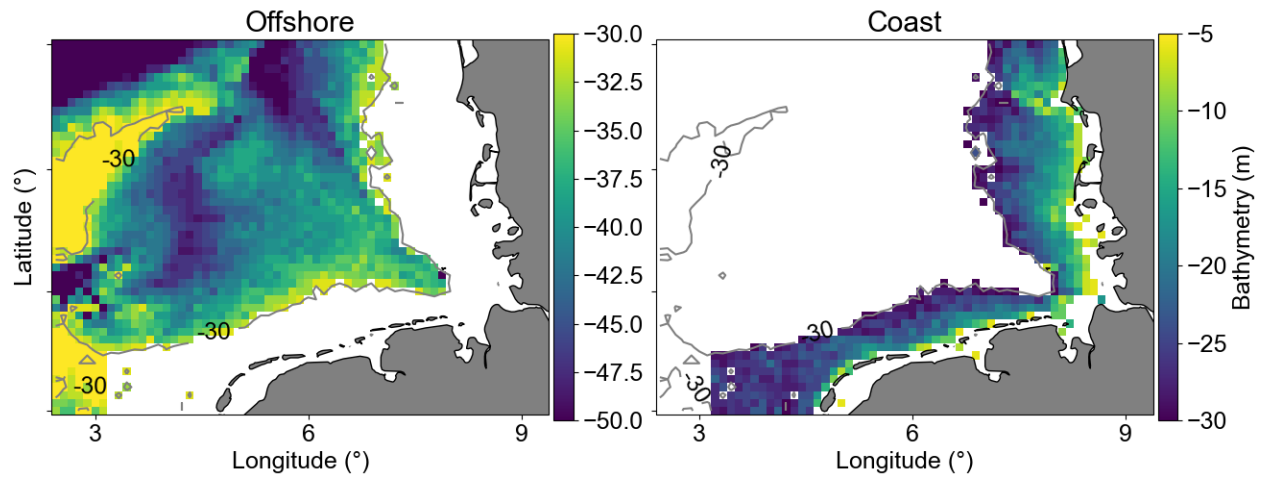

Figure S1: Definition of offshore and coastal areas, based on the isobath of 30 m.

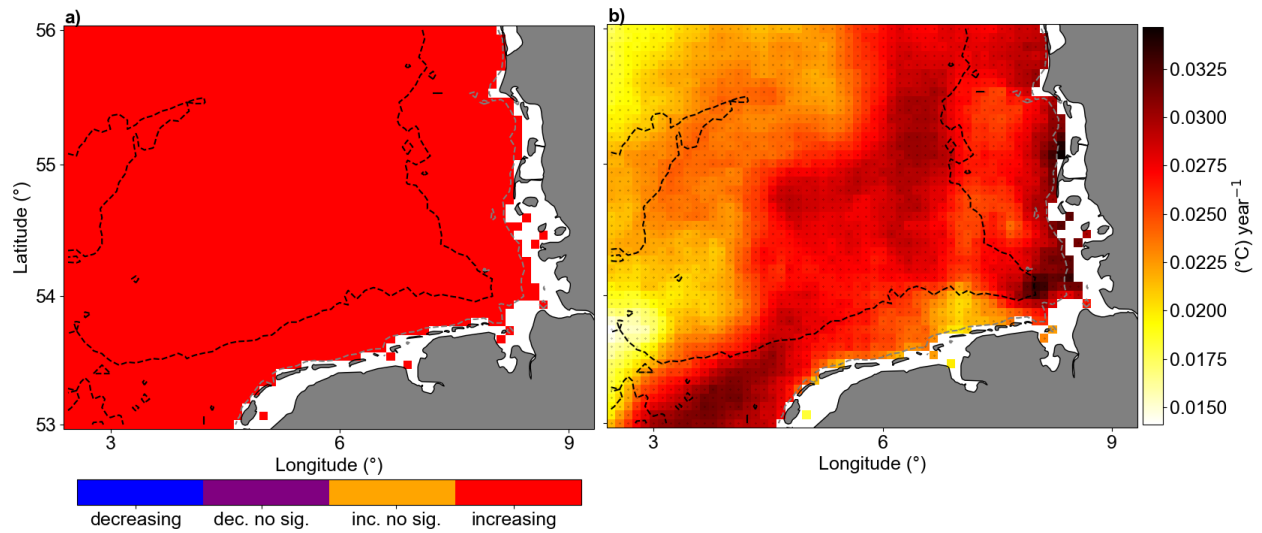

Figure S2: a) SST anomalies significance trends calculated by the modified Mann Kendall trend test. b) Linear trends of SST anomalies ( $^{\circ}\text{C}$  per year). Trends are significant for all grid cells.

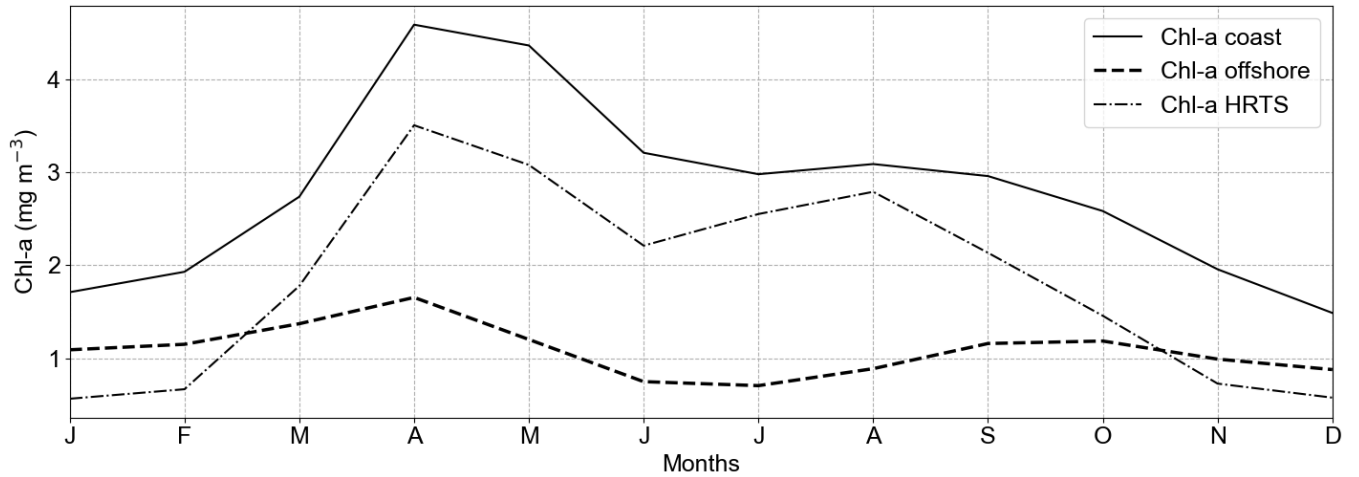

Figure S3: Seasonal cycle of Chl-a averaged for areas above the isobath of 30m (coast), areas below 30m (offshore) and HRTS.

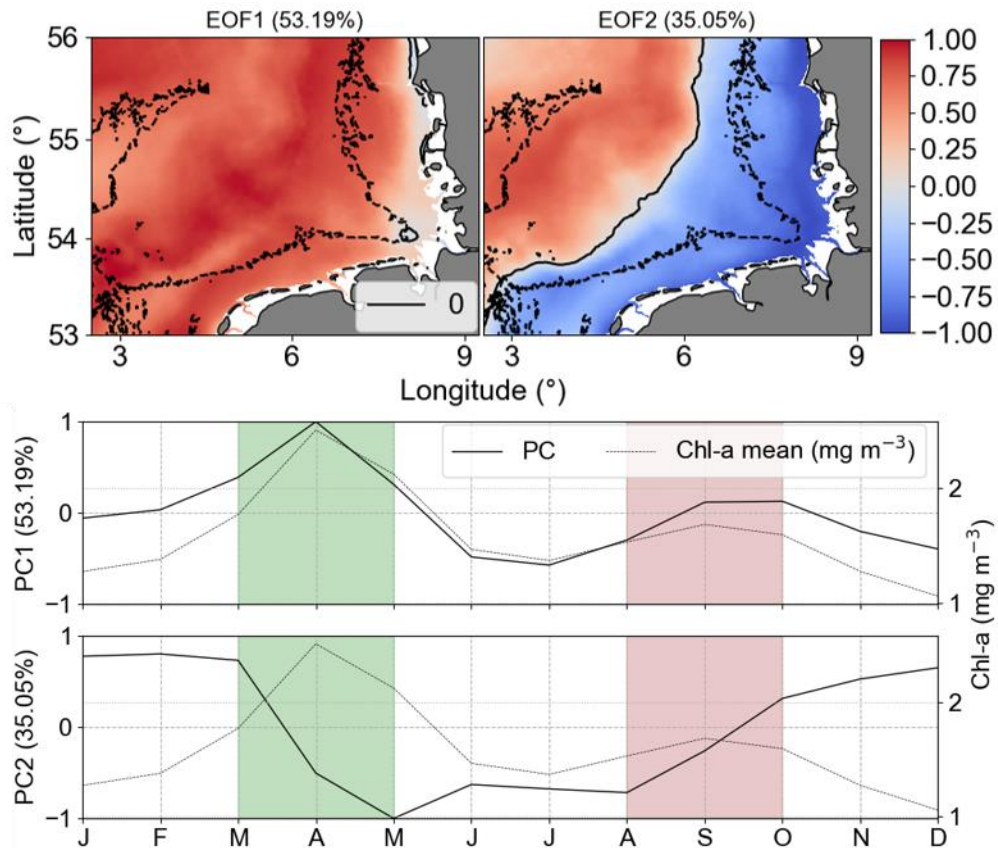

Figure S4: First and second EOF spatial pattern (top) and PC temporal modes (bottom) of monthly climatological means of Chl-a. Dashed thin line superimposed by the PC lines is the Chl-a spatially averaged at the study area. March-April period (green shaded) and August-September (pink shaded).

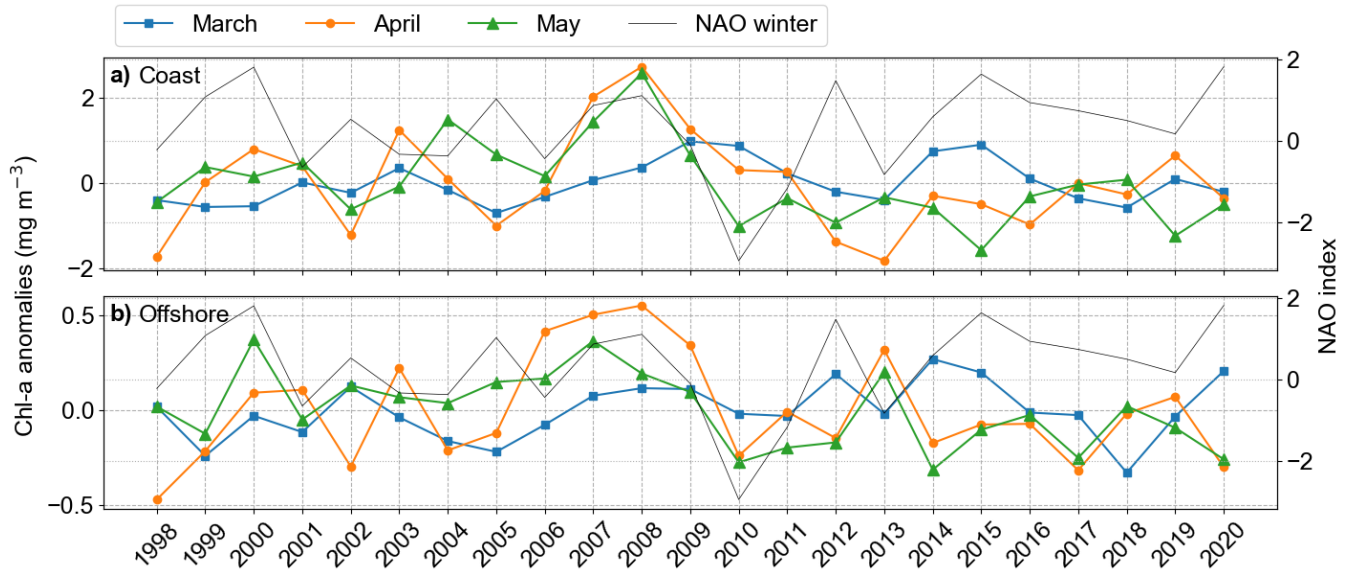

**Figure S5: Spatial averages of Chl-a anomalies in coastal waters (a) and offshore (b) for the months March, April and May. The NAO index winter mean (December, January, February) is the black thin line.**
